# Supplementary material for: D-Limonene Affects the Feeding Behavior and the Acquisition and Transmission of Tomato Yellow Leaf Curl Virus by Bemisia tabaci
Source: MDPI journal article supplement (doi:10.3390/v16020300), 2024-02-15
Supplement: s1 [file s1]

**Table S1.** Primers used in this study

| Gene name                        | Purpose                          | Primer Sequence (5'–3')        |
|----------------------------------|----------------------------------|--------------------------------|
| TYLCV-F                          | Detection of TYLCV               | ATGTCGAAGCGACCAGGC             |
| TYLCV-R                          |                                  | GATGCGTATTTTCATAGTTGCATATACTGG |
| <i>Actin-F</i>                   | <i>B. tabaci</i> reference genes | CGGTGATTTCCTTCTGCATT           |
| <i>Actin-R</i>                   |                                  | ACCGCAAGATTCCATACCC            |
| <i>EF-1<math>\alpha</math>-F</i> | <i>B. tabaci</i> reference genes | TAGCCTTGTGCCAATTTCGG           |
| <i>EF-1<math>\alpha</math>-R</i> |                                  | CCTTCAGCATTACCGTCC             |
| <i>BtabOBP1-F</i>                | <i>BtabOBP1</i> RT-qPCR          | AAGTGCTTGACGGATTATTAC          |
| <i>BtabOBP1-R</i>                |                                  | GCATCATATTATCGCAGTGT           |
| <i>BtabOBP2-F</i>                | <i>BtabOBP2</i> RT-qPCR          | CAACAACCCCTCAACCGACA           |
| <i>BtabOBP2-R</i>                |                                  | TCATGTCAGGTGTCAGAAGGC          |
| <i>BtabOBP3-F</i>                | <i>BtabOBP3</i> RT-qPCR          | CTATCTCGGTTTCAGTTCCA           |
| <i>BtabOBP3-R</i>                |                                  | TGTCTTTCCACTCGCTAT             |
| <i>BtabOBP4-F</i>                | <i>BtabOBP4</i> RT-qPCR          | GTTTCTTGGAGTGCGTTTA            |
| <i>BtabOBP4-R</i>                |                                  | TCATCATCATCAGCCTCTT            |
| <i>BtabOBP5-F</i>                | <i>BtabOBP5</i> RT-qPCR          | AAGTAAAGGCTGTGGATGA            |
| <i>BtabOBP5-R</i>                |                                  | CGAGTAATAGTTGTTGTCTTGA         |
| <i>BtabOBP6-F</i>                | <i>BtabOBP6</i> RT-qPCR          | GTAGCAATACAGGTGGAGA            |
| <i>BtabOBP6-R</i>                |                                  | ATGACACTCTTGACATTAGC           |
| <i>BtabOBP7-F</i>                | <i>BtabOBP7</i> RT-qPCR          | TCGAATCAGATGCAGAGGGTG          |
| <i>BtabOBP7-R</i>                |                                  | TATCCGGGGGACTCATTCCA           |

*BtabOBP8-F*

TGATGGCGTGTCTTATGA

*BtabOBP8* RT-qPCR

*BtabOBP8-R*

CTGAGGTTGAGTGCTGTA

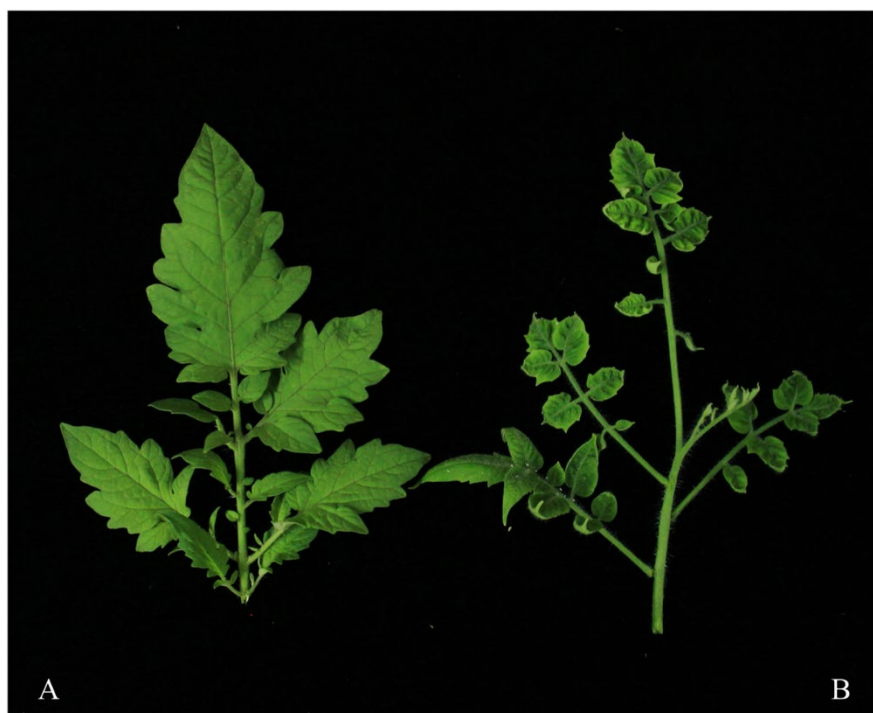

**Figure S1** Tomato plants. (A) Healthy tomato leaves. (B) TYLCV-infected tomato leaves.

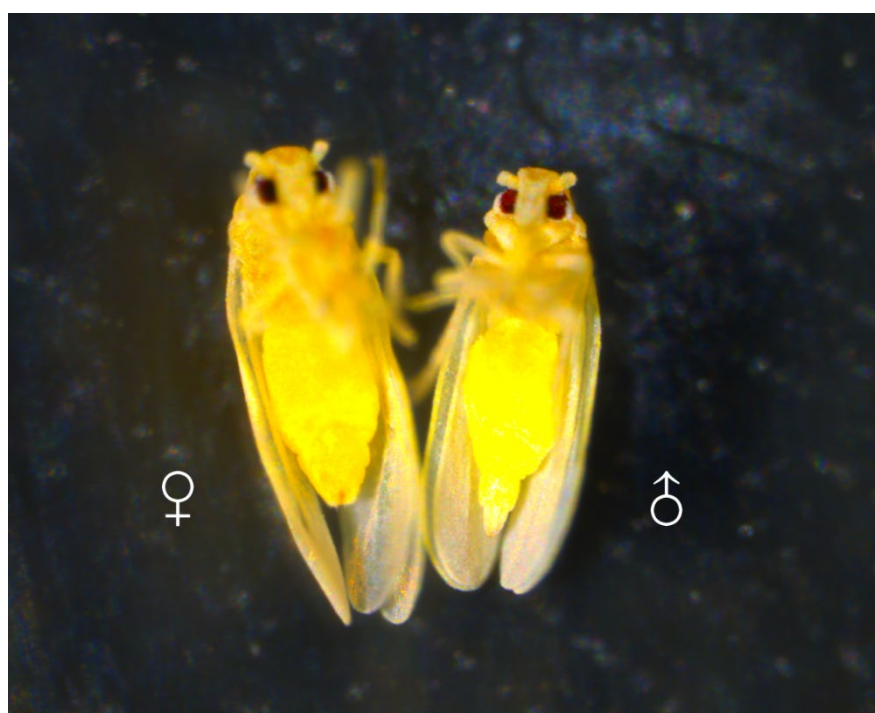

**Figure S2** Female (♀) and male (♂) *B. tabaci* under a stereo microscope.

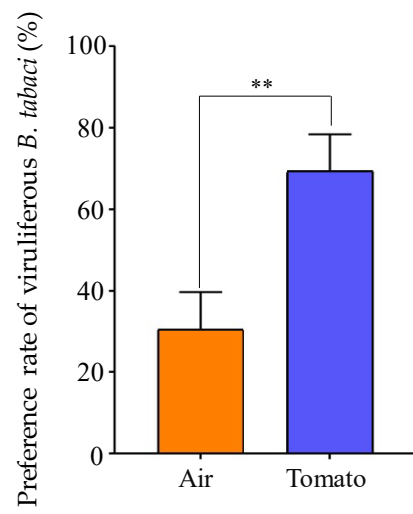

**Figure S3** Preference of viruliferous *B. tabaci* MED for air vs. tomato. Values are means  $\pm$  SEM. Different number of asterisk (\*) and letters above each bar indicate significant differences ( $P < 0.05$ ) among the treatments.

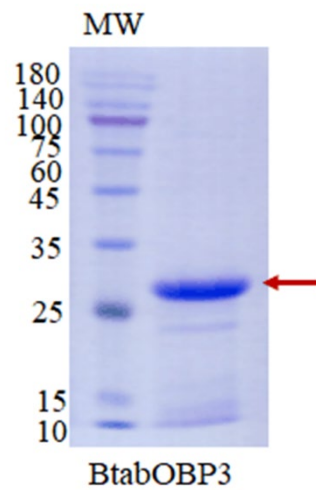

**Figure S4** Expression tests of the target protein.

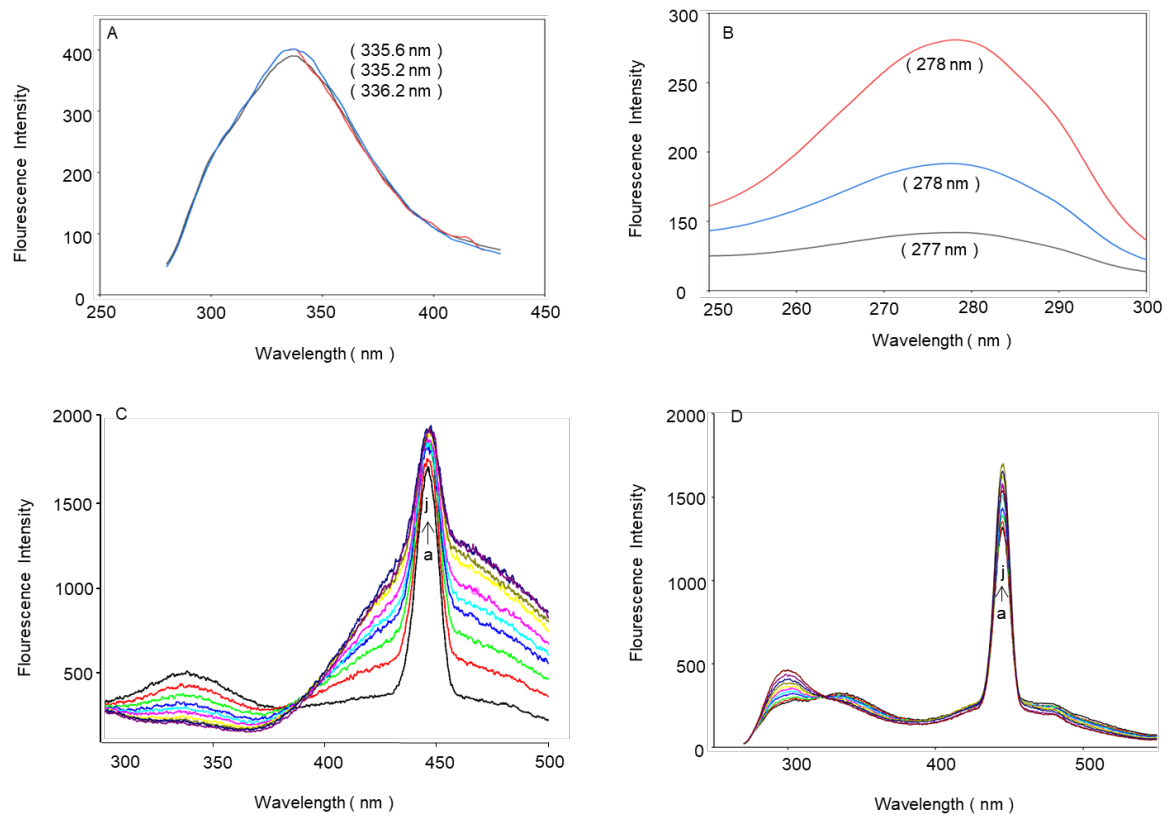

**Figure S5** Spectra of BtabOBP3 binding test with d-limonene. (A) Determination of the optimum emission wavelength of BtabOBP3. (B) Determination of the optimum excitation wavelength of BtabOBP3. (C) Emission spectrum of 1-NPN and BtabOBP3. (D) D-limonene competes for 1-NPN emission spectra.

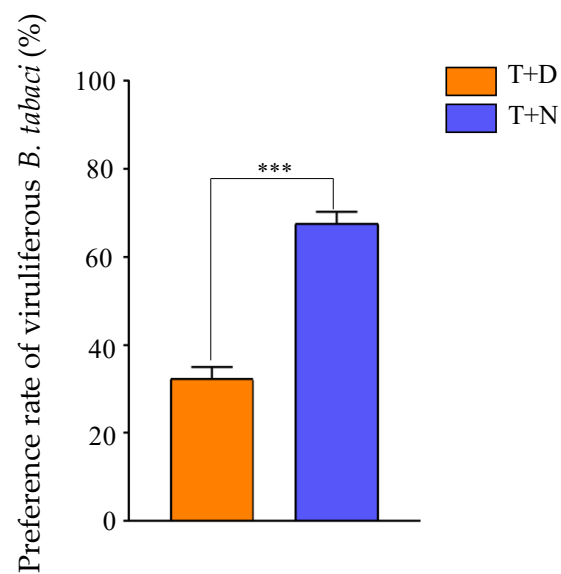

**Figure S6** Preference of viruliferous *B. tabaci* MED for tomatoes mixed with  $10^{-2}$  g/mL d-limonene (T+D) vs. tomatoes mixed with n-hexane (T+N). Values are means  $\pm$  SEM. Different number of asterisk (\*) and letters above each bar indicate significant differences ( $P < 0.05$ ) among the treatments.
